# Supplementary material for: Access to Critical Health Information for Children During Emergencies: Emergency Information Forms and Beyond
Source: Oxford University Press journal article supplement (doi:10.1542/peds.2022-060970), 2023-02-20
Supplement: peds_2022060970supplementarydata1.pdf [file peds_2022060970supplementarydata1.pdf]

**SUPPLEMENTAL TABLE 1** Continued

| Revised EIF Section | Recommended EIF Elements                                  | USCDI V1 Data Class          | USCDI V1 Data Elements                                                                   |
|---------------------|-----------------------------------------------------------|------------------------------|------------------------------------------------------------------------------------------|
| Pharmacies          | Site of tertiary care phone number<br>(May list multiple) | Care team member(s)          | Care team member(s)                                                                      |
|                     | Pharmacy name                                             |                              | Care team member(s)                                                                      |
|                     | Preferred pharmacy (Y or N)                               |                              | Care team member(s)                                                                      |
|                     | Pharmacy address                                          |                              | Care team member(s)                                                                      |
|                     | Pharmacy phone number                                     |                              | Care team member(s)                                                                      |
| Medical summary     |                                                           | Clinical notes or problems   |                                                                                          |
|                     | Current problems or diagnoses                             |                              | Consultation note; discharge summary note; history and physical; progress note; problems |
|                     | Procedures or surgeries<br>(description and dates)        |                              | Procedure note                                                                           |
|                     | Recent imaging results                                    |                              | Imaging narrative                                                                        |
|                     | Goals                                                     | Goals                        | Goals                                                                                    |
|                     | Recent laboratory results                                 | Laboratory or clinical notes | Tests; values or results; laboratory report narrative                                    |
|                     | Immunizations                                             | Immunizations                | Immunizations                                                                            |
|                     | Current medications (name, dose, route, frequency)        | Medications                  | Medications                                                                              |

USCDI V1<sup>35</sup> data elements not recommended for inclusion in Revised EIF: phone number type, smoking status, BMI percentile, weight-for-length percentile, head occipital-frontal circumference, pathology report narrative.
